# Supplementary material for: The Official Website as an Essential E-Governance Tool: A Comparative Analysis of the Romanian Cities’ Websites in 2019 and 2022
Source: MDPI journal article supplement (doi:10.3390/su14116863), 2022-06-04
Supplement: s1 [file s1]

**Table S1.** Survey Instrument for Evaluating Romanian Cities' Websites.

|   |                   | Reviewer's Name:                                                                                                                                                                    |                                                                                                           | Overall City Score       | 0.00 |   |   |     |             |       |
|---|-------------------|-------------------------------------------------------------------------------------------------------------------------------------------------------------------------------------|-----------------------------------------------------------------------------------------------------------|--------------------------|------|---|---|-----|-------------|-------|
|   |                   | Reviewer's E-mail:                                                                                                                                                                  |                                                                                                           | 1. Security/Privacy      | 0.00 |   |   |     |             |       |
|   |                   | Name of City:                                                                                                                                                                       |                                                                                                           | 2. Usability             | 0.00 |   |   |     |             |       |
|   |                   | Web Address of the City:                                                                                                                                                            |                                                                                                           | 3. Content               | 0.00 |   |   |     |             |       |
|   |                   | Review Date:                                                                                                                                                                        |                                                                                                           | 4. Service               | 0.00 |   |   |     |             |       |
|   |                   |                                                                                                                                                                                     |                                                                                                           | 5. Citizen Participation | 0.00 |   |   |     |             |       |
| # | Dimensions        | Measures                                                                                                                                                                            | Criteria                                                                                                  | 0                        | 1    | 2 | 3 | N/A | Description | Score |
| 1 | Security /Privacy | Does the site have a privacy or security statement/policy? (When statements/policies are posted on websites where data are collected from users, choose and evaluate the best one.) | 0 = No;<br>1 = The site has a privacy or security statement/policy.                                       |                          |      | X | X |     |             | 0     |
| 2 | Security /Privacy | Is direct access to privacy policy available on every page that requires or accepts data?                                                                                           | 0 = No;<br>1 = Access to the privacy policy is available on all pages that require or accept data.        |                          |      | X | X |     |             | 0     |
| 3 | Security /Privacy | Does the privacy policy identify the organization or agency that is collecting data or information on the site?                                                                     | 0 = No;<br>1 = The privacy policy identifies the organization collecting data or information on the site. |                          |      | X | X |     |             | 0     |
| 4 | Security /Privacy | Does the privacy policy identify exactly what data are being collected on the site? (e.g., personal information)                                                                    | 0 = No;<br>1 = The privacy policy identifies what data are being collected on the site.                   |                          |      | X | X |     |             | 0     |
| 5 | Security /Privacy | Does the privacy policy identify the context in which the data are collected? (e.g., registration form v. cookies)                                                                  | 0 = No;<br>1 = The privacy policy identifies what data are being collected on the site.                   |                          |      | X | X |     |             | 0     |
| 6 | Security /Privacy | Does the privacy policy identify the intended use of the data collected?                                                                                                            | 0 = No;<br>1 = The privacy policy identifies the intended use of the data collected.                      |                          |      | X | X |     |             | 0     |
| 7 | Security /Privacy | Does the privacy policy address the option to have personal                                                                                                                         | 0 = No;<br>1 = The privacy policy addresses the option to                                                 |                          |      | X | X |     |             | 0     |

|    |                                                                                                                                                                                                                      |                                                                                                                                                                                                                                                 |   |   |   |
|----|----------------------------------------------------------------------------------------------------------------------------------------------------------------------------------------------------------------------|-------------------------------------------------------------------------------------------------------------------------------------------------------------------------------------------------------------------------------------------------|---|---|---|
|    | information used to send unsolicited materials? (e.g., mailing lists or another other marketing that is targeted back to the consumer)                                                                               | have personal information used to send unsolicited materials.                                                                                                                                                                                   |   |   |   |
| 8  | 1. Security /Privacy<br>Does the privacy policy address third-party policy, whether personal information is disclosed to third parties, and whether it provides instructions to decline any third-party disclosures? | 0 = No;<br>1 = The privacy policy addresses whether personal information is disclosed to any third parties;<br>2 = The privacy policy provides instructions for users to decline the disclosure of their personal information to third parties. | X |   | 0 |
| 9  | 1. Security /Privacy<br>Does the privacy policy address the ability for site users to review personal data records and contest the inaccuracies/completeness of the information?                                     | 0 = No;<br>1 = The privacy policy addresses the ability for site users to review personal data records and contest the inaccuracies/completeness of the information.                                                                            | X | X | 0 |
| 10 | 1. Security /Privacy<br>Does the privacy policy address managerial measures that limit the access of data and assure they are not used for unauthorized purposes?                                                    | 0 = No;<br>1 = The privacy policy addresses managerial measures that limit the access of data and assures they are not used for unauthorized purposes.                                                                                          | X | X | 0 |
| 11 | 1. Security /Privacy<br>Does the privacy policy address the use of encryption in the transmission of data?                                                                                                           | 0 = No;<br>1 = The privacy policy addresses the use of encryption in the transmission of data.                                                                                                                                                  | X | X | 0 |
| 12 | 1. Security /Privacy<br>Does the privacy policy address whether personal information is stored on a secure server or a server that is inaccessible from the internet?                                                | 0 = No;<br>1 = The privacy policy addresses whether personal information is stored on a secure server or a server that is inaccessible from the internet.                                                                                       | X | X | 0 |
| 13 | 1. Security /Privacy<br>Does the privacy policy address the use of “cookies” or “web beacons?” to track users?                                                                                                       | 0 = No;<br>1 = The privacy policy addresses the use of “cookies” or “web beacons”.                                                                                                                                                              | X | X | 0 |

|    |                      |                                                                                                                                                                                                                                       |                                                                                                                                                                                                         |   |   |   |
|----|----------------------|---------------------------------------------------------------------------------------------------------------------------------------------------------------------------------------------------------------------------------------|---------------------------------------------------------------------------------------------------------------------------------------------------------------------------------------------------------|---|---|---|
| 14 | 1. Security /Privacy | Does the privacy policy address the notification of privacy policy changes/updates?                                                                                                                                                   | 0 = No;<br>1 = The privacy policy addresses the notification of privacy policy changes or updates.                                                                                                      | X | X | 0 |
| 15 | 1. Security /Privacy | Is there a specific contact or e-mail address for inquiries regarding the privacy policy?                                                                                                                                             | 0 = No;<br>1 = The privacy policy lists a specific contact or e-mail address for the privacy policy.                                                                                                    | X | X | 0 |
| 16 | 1. Security /Privacy | Does the site offer access to public information through a restricted area that requires registration (with payment or without payment) or a password? (e.g., access to court records, archives and libraries at Court or Parliament) | 0 = No;<br>3 = The site offers access to public information through a restricted area that requires registration or a password.                                                                         | X | X | 0 |
| 17 | 1. Security /Privacy | Does the site offer access to nonpublic information for employees through a restricted area that requires a password?                                                                                                                 | 0 = No;<br>3 = The site offers access to nonpublic information for employees through a restricted area that requires a password.                                                                        | X | X | 0 |
| 18 | 1. Security /Privacy | Does the privacy policy address the use of digital signatures to authenticate users?                                                                                                                                                  | 0 = No;<br>3 = The privacy policy addresses the use of digital signatures to authenticate users.                                                                                                        | X | X | 0 |
| 19 | 1. Security /Privacy | Does the site provide the function of checking for viruses when downloading files?                                                                                                                                                    | 0 = No;<br>3 = The site provides the function of checking for viruses when downloading files.                                                                                                           | X | X | 0 |
| 20 | 1. Security /Privacy | Does the site provide the function of checking for viruses when streaming audio or video files?                                                                                                                                       | 0 = No;<br>3 = The site provides the function of checking for viruses when streaming audio or video files.                                                                                              | X | X | 0 |
| 21 | 2. Usability         | Homepage length: How many screens does it take to view the main city homepage?                                                                                                                                                        | Homepage length: Text size set to “medium” at the “view” menu of Internet Explorer on a 17-inch monitor:<br>0 = No homepage;<br>1 = 5 or more screens;<br>2 = 3 or 4 screens;<br>3 = 2 screens or less. |   |   | 0 |

|     |    |                                                                                                                                                                                                                                                                   |                                                                                                                                                                                                                                                                                                                                           |   |   |   |   |   |
|-----|----|-------------------------------------------------------------------------------------------------------------------------------------------------------------------------------------------------------------------------------------------------------------------|-------------------------------------------------------------------------------------------------------------------------------------------------------------------------------------------------------------------------------------------------------------------------------------------------------------------------------------------|---|---|---|---|---|
| 21. | 2. | Copy the text of the Homepage into a Word document and include an Excel file.                                                                                                                                                                                     | You can collect the text by Selecting All (Ctrl A) and Copying (Ctrl C) and Pasting into Word (Ctrl P).                                                                                                                                                                                                                                   | X | X | X | X | 0 |
| 22. | 2. | Usability Page length: Are alternative versions (e.g., .doc or .pdf) available for long documents—e.g., documents more than three to four screens long?                                                                                                           | 0 = No;<br>1 = Alternative versions are available for long documents.                                                                                                                                                                                                                                                                     |   |   | X | X | 0 |
| 23. | 2. | Usability Targeted audience links: Are targeted audience links available on the homepage? (e.g., general citizens, youths, the old, women, family, citizens in need of social welfare services, businesses, industries, small businesses, public employees, etc.) | 0 = No;<br>1 = Targeted audience links are divided into two categories;<br>2 = Targeted audience links are divided into three categories;<br>3 = Targeted audience links are divided into more than three categories.                                                                                                                     |   |   |   |   | 0 |
| 24. | 2. | Usability Navigation Bar (1 point for each factor, max = 3)                                                                                                                                                                                                       | +1 Point: Navigation bars are formatted consistently throughout the site; +1 Point: Placement of navigation bars is consistent throughout the site (vertical on left or horizontal across top); +1 Point: There is a clear indication that navigation bars are “clickable” (e.g., buttons with a drop down shadow or which change color). |   |   |   |   | 0 |
| 25. | 2. | Usability Navigation (1 point for each factor, max = 2)                                                                                                                                                                                                           | +1 Point: There is a link to the main city homepage on every page; +1 Point: Text navigation or navigation bar links are available at the bottom, top, or left of every page (links to contact information, site search, employee directory, etc.).                                                                                       |   |   |   | X | 0 |
| 26. | 2. | Usability Site map: Is a sitemap available?                                                                                                                                                                                                                       | Text size set to “medium” at the “view” menu of Internet Explorer on a 17-                                                                                                                                                                                                                                                                |   |   |   |   | 0 |

|    |                 |                                                                                                                                                                                                                                                                                                                                                                                   |                                                                                                                                                                                    |     |   |
|----|-----------------|-----------------------------------------------------------------------------------------------------------------------------------------------------------------------------------------------------------------------------------------------------------------------------------------------------------------------------------------------------------------------------------|------------------------------------------------------------------------------------------------------------------------------------------------------------------------------------|-----|---|
|    |                 | inch monitor:<br>0 = No sitemap;<br>1 = A site map is available,<br>but it does not contain<br>active links and is more<br>than 1.5 screens in length;<br>2 = A sitemap is available<br>and it contains either active<br>links or is less than 2<br>screens in length;<br>3 = A sitemap is available,<br>it contains active links, and<br>it is less than 2 screens in<br>length. |                                                                                                                                                                                    |     |   |
| 27 | 2.<br>Usability | Font Color and<br>Formatting: Is the font<br>color and formatting<br>consistent throughout<br>the site?                                                                                                                                                                                                                                                                           | 0 = No;<br>1 = Font color and<br>formatting are consistent<br>throughout the site. -1<br>Point (O total): If animated,<br>blinking or zooming<br>effects, or ALL CAPS are<br>used. | X X | 0 |
| 28 | 2.<br>Usability | Is the font color, size,<br>and formatting<br>differentiated between<br>titles and detailed<br>content?                                                                                                                                                                                                                                                                           | 0 = No;<br>1 = The font color, size, and<br>formatting is differentiated<br>between titles and detailed<br>content.                                                                | X X | 0 |
| 29 | 2.<br>Usability | Do visited links change<br>color from the original<br>link color?                                                                                                                                                                                                                                                                                                                 | 0 = No;<br>1 = Visited links change<br>color from the original link<br>color.                                                                                                      | X X | 0 |
| 30 | 2.<br>Usability | Forms: Are required<br>fields noted explicitly?                                                                                                                                                                                                                                                                                                                                   | 0 = No;<br>1 = Required fields are<br>noted explicitly.                                                                                                                            | X X | 0 |
| 31 | 2.<br>Usability | Forms: Does the form<br>provide additional<br>information about how<br>to fix errors, if they are<br>submitted? (Evaluators<br>need to make errors by<br>inputting wrong<br>information from<br>Question 31 to 33)                                                                                                                                                                | 0 = No;<br>1 = If errors are submitted,<br>the form provides<br>additional information<br>about how to fix them.                                                                   | X X | 0 |
| 32 | 2.<br>Usability | Forms: Do visitors<br>have to re-enter all<br>information, if errors<br>are submitted?                                                                                                                                                                                                                                                                                            | 0 = No;<br>1 = If errors are submitted,<br>visitors do not have to re-<br>enter all information.                                                                                   | X X | 0 |
| 33 | 2.<br>Usability | Forms: Does the form<br>explicitly label fields<br>that need to be                                                                                                                                                                                                                                                                                                                | 0 = No;<br>1 = If errors are submitted,<br>the form explicitly labels                                                                                                              | X X | 0 |

|    | changed, if errors are submitted? | fields that need to be changed.                                                                                                                                                                                                 |                                                                                                                                                                         |     |   |
|----|-----------------------------------|---------------------------------------------------------------------------------------------------------------------------------------------------------------------------------------------------------------------------------|-------------------------------------------------------------------------------------------------------------------------------------------------------------------------|-----|---|
| 34 | 2. Usability                      | Is a search tool available?                                                                                                                                                                                                     | 0 = No;<br>1 = Some departments have search tools;<br>2 = There is a search tool at the main city homepage.                                                             | X   | 0 |
| 35 | 2. Usability                      | Is there help available for using the site search (search tips)?                                                                                                                                                                | 0 = No;<br>1 = There is help available for using the site search.                                                                                                       | X X | 0 |
| 36 | 2. Usability                      | Does the site search offer the ability to limit the scope of a search to specific areas of the site (e.g., search only in “public works” or only in “mayor’s office”)?                                                          | 0 = No;<br>1 = The site search offers the ability to limit the scope of the search to specific areas of the site.                                                       | X X | 0 |
| 37 | 2. Usability                      | Does the site search provide advanced search options or features (e.g., match all/any words, exact phrase searching—can use quotes, Boolean searching—can use AND/OR/NOT operators)?                                            | 0 = No;<br>1 = The site search provides an advanced search option.                                                                                                      | X X | 0 |
| 38 | 2. Usability                      | Does the site search offer the ability to narrow a set of returned search results (e.g., perform a sub-search once an initial search has been initiated)?                                                                       | 0 = No;<br>1 = The site search offers the ability to narrow a set of returned search results.                                                                           | X X | 0 |
| 39 | 2. Usability                      | Does the site search offer the ability to sort search results by relevance, data, or other criteria?                                                                                                                            | 0 = No;<br>1 = The site offers the ability to sort search results by relevance, data, or other criteria.                                                                | X X | 0 |
| 40 | 2. Usability                      | Does the site provide the date (month and year) of the most recent update of the website? (Evaluators should compare the month and year posted on the main homepage and the most recent date of a press release, newsletter, or | 0 = No;<br>1 = The date is more than three months old;<br>2 = The date is more than one month and less than three months old;<br>3 = The date is one month old or less. |     | 0 |

|    |               |                                                                                                              |                                                                                                                                                                                                                                                                                                                         |     |   |
|----|---------------|--------------------------------------------------------------------------------------------------------------|-------------------------------------------------------------------------------------------------------------------------------------------------------------------------------------------------------------------------------------------------------------------------------------------------------------------------|-----|---|
|    |               | community update; then, choose and evaluate the most recent date of an update)                               |                                                                                                                                                                                                                                                                                                                         |     |   |
| 41 | 3.<br>Content | Does the site provide information about the location (direction, address) of offices?                        | 0 = No;<br>1 = The site provides information about the location (direction, address) of offices.                                                                                                                                                                                                                        | X X | 0 |
| 42 | 3.<br>Content | Does the site offer a listing of external links (private sector, state, or federal information or services)? | 0 = No;<br>1 = The site offers a listing of external links.                                                                                                                                                                                                                                                             | X X | 0 |
| 43 | 3.<br>Content | Does the site offer contact information for agencies/departments or employees/public officials?              | 0 = No;<br>1 = The site offers a listing of phone numbers or e-mail addresses for agencies/departments or employees/public officials;<br>2 = The site allows users to download a phone number directory or an e-mail directory;<br>3 = The site allows users to search a database of phone numbers or e-mail addresses. |     | 0 |
| 44 | 3.<br>Content | Does the site provide the minutes of public meetings?                                                        | 0 = No;<br>1 = The site offers public meeting minutes online in html format (e.g., as a web page);<br>2 = The site offers public meeting minutes online in a downloadable format (e.g., .doc or .pdf);<br>3 = The site offers an online searchable database or archives of public meeting minutes.                      |     | 0 |
| 45 | 3.<br>Content | Does the site provide the city code, city ordinance, or city regulations online?                             | 0 = No;<br>1 = The site provides the city code, city ordinance, or city regulations online in html format (e.g., as a web page);<br>2 = The site provides the city code online in a                                                                                                                                     |     | 0 |

|    |               |                                                                                                                                                                                                                                                                                                                                                                                                                                                                                                                  |   |
|----|---------------|------------------------------------------------------------------------------------------------------------------------------------------------------------------------------------------------------------------------------------------------------------------------------------------------------------------------------------------------------------------------------------------------------------------------------------------------------------------------------------------------------------------|---|
|    |               | downloadable format (e.g., .doc or .pdf);<br>3 = The site provides an online searchable database of the city code.                                                                                                                                                                                                                                                                                                                                                                                               |   |
| 46 | 3.<br>Content | Does the site provide the city charter, policy priority, or the mission of the city online?<br>0 = No;<br>1 = The site provides the city charter, policy priority, or the mission of the city online in html format (e.g., as a web page);<br>2 = The site provides the city charter, policy priority, or the mission of the city online in a downloadable format (e.g., .doc or .pdf);<br>3 = The site provides an online searchable database of the city charter, policy priority, or the mission of the city. | 0 |
| 47 | 3.<br>Content | Does the site contain mission statements for agencies?<br>0 = No;<br>1 = The site provides mission statements for one or two departments;<br>2 = The site provides mission statements for three or four departments;<br>3 = The site provides mission statements for all departments.                                                                                                                                                                                                                            | 0 |
| 48 | 3.<br>Content | Does the site provide budget information online?<br>0 = No;<br>1 = The site provides static budget reports online in html format (e.g., as a web page);<br>2 = The site provides static budget reports online in a downloadable format (e.g., .doc or .pdf);<br>3 = The site provides an online searchable database of budget information.                                                                                                                                                                       | 0 |
| 49 | 3.<br>Content | Does the site offer documents, reports, or books (publications) online?<br>0 = No;<br>1 = The site provides documents, reports, or books (publications) online in html format (e.g., as a web page);<br>2 = The site provides documents, reports, or                                                                                                                                                                                                                                                             | 0 |



|    |               |                                                                                                                                                                                     |                                                                                                                                                                                                                     |     |   |
|----|---------------|-------------------------------------------------------------------------------------------------------------------------------------------------------------------------------------|---------------------------------------------------------------------------------------------------------------------------------------------------------------------------------------------------------------------|-----|---|
|    |               | books (publications) online in a downloadable format (e.g., .doc or .pdf);<br>3 = The site provides an online searchable database of documents, reports, or books (publications).   |                                                                                                                                                                                                                     |     |   |
| 50 | 3.<br>Content | Does the site allow users to purchase or order documents, reports, or books (publications)?                                                                                         | 0 = No;<br>3 = The site allows users to purchase or order documents, reports, books (publications) online, or the site allows users to register for downloading documents, reports, or books (publications) online. | X X | 0 |
| 51 | 3.<br>Content | Does the site have GIS capabilities?                                                                                                                                                | 0 = No;<br>1 = The site offers static GIS maps;<br>2 = The site offers GIS data in a downloadable format;<br>3 = The site offers dynamic GIS capabilities (customizable maps).                                      |     | 0 |
| 52 | 3.<br>Content | Does the site have an emergency management or alert mechanism (severe weather, etc.)?                                                                                               | 0 = No;<br>1 = The site has an emergency management or alert mechanism.                                                                                                                                             | X X | 0 |
| 53 | 3.<br>Content | Does the site provide disability access for the blind (online)?                                                                                                                     | 0 = No;<br>1 = The site provides disability access for the blind                                                                                                                                                    | X X | 0 |
| 54 | 3.<br>Content | Does the site address disability access for the deaf (TDD phone service)?                                                                                                           | 0 = No;<br>1 = The site addresses disability access for the deaf (TDD phone service).                                                                                                                               | X X | 0 |
| 55 | 3.<br>Content | Does the site use wireless technology such as messages to a mobile phone, a Palm Pilot, or a PDA (Personal Digital Assistance) to provide updates about applications, events, etc.? | 0 = No;<br>3 = The site uses wireless technology such as messages to a mobile phone, a Palm Pilot, or a PDA (Personal Digital Assistance) to provide updates about applications, events, etc.                       | X X | 0 |
| 56 | 3.<br>Content | Does the site offer access in more than one language?                                                                                                                               | 0 = No;<br>1 = The site offers access in more than one language.                                                                                                                                                    | X X | 0 |

|    |               |                                                                                                                             |                                                                                                                                                                                                                                                                                                                                                                                                             |   |
|----|---------------|-----------------------------------------------------------------------------------------------------------------------------|-------------------------------------------------------------------------------------------------------------------------------------------------------------------------------------------------------------------------------------------------------------------------------------------------------------------------------------------------------------------------------------------------------------|---|
| 57 | 3.<br>Content | Does the site offer job listings of public office or position vacancies at the city government online?                      | <p>0 = No;<br/>1 = The site provides job listings or position vacancies online in html format (e.g., as a web page);<br/>2 = The site provides job listings or position vacancies online in a downloadable format (e.g., .doc or .pdf);<br/>3 = The site provides an online searchable database of job listings or position vacancies or the site allows for the online submission of job applications.</p> | 0 |
| 58 | 3.<br>Content | Does the site offer human resources information online for current employees (e.g., personnel policies or personnel forms)? | <p>0 = No;<br/>1 = The site provides human resource information online in html format (e.g., a web page);<br/>2 = The site provides human resources information online in a downloadable format (e.g., .doc or .pdf);<br/>3 = The site provides an online searchable database of human resources information OR the site allows for the online submission of personnel forms.</p>                           | 0 |
| 59 | 3.<br>Content | Does the site offer a calendar of events?                                                                                   | <p>0 = No;<br/>1 = The site provides news or a calendar of events online in html format (e.g., a web page);<br/>2 = The site offers a calendar of events online in a downloadable format (e.g., .doc or .pdf);<br/>3 = The site provides an online searchable calendar of events (or under each month).</p>                                                                                                 | 0 |
| 60 | 3.<br>Content | Number of downloadable documents for three departments or                                                                   | <p>0 = No;<br/>1 = From one to three downloadable documents;<br/>2 = From four to six</p>                                                                                                                                                                                                                                                                                                                   | 0 |

|    |                                                                                                                                                                                                                                                    |                                                                                                                         |                                                                                                                                                                                                                                                            |     |
|----|----------------------------------------------------------------------------------------------------------------------------------------------------------------------------------------------------------------------------------------------------|-------------------------------------------------------------------------------------------------------------------------|------------------------------------------------------------------------------------------------------------------------------------------------------------------------------------------------------------------------------------------------------------|-----|
|    | bureaus in the city government (maximum = three departments; examples of departments: budget, social welfare, and transportation; if one of these is not the function of the city, select another department that provides downloadable documents) | downloadable documents, 3 = More than six downloadable documents.                                                       |                                                                                                                                                                                                                                                            |     |
| 61 | 4. Service                                                                                                                                                                                                                                         | Does the site allow users to pay utilities? (State utilities in description: e.g., tap water, sewage, gas, electricity) | 0 = No;<br>1 = The site provides information for users to pay their utilities;<br>3 = The site allows users to pay their utilities online.                                                                                                                 | X 0 |
| 62 | 4. Service                                                                                                                                                                                                                                         | Does the site allow users to file or pay taxes?                                                                         | 0 = No;<br>1 = The site provides information for users to pay their taxes;<br>2 = The site allows users to download tax forms (to be returned via mail or fax);<br>3 = Users can pay taxes online.                                                         | 0   |
| 63 | 4. Service                                                                                                                                                                                                                                         | Does the site allow users to pay fines or tickets?                                                                      | 0 = No;<br>1 = The site provides information about where to call about paying fines or tickets;<br>2 = The site allows users to download forms for paying fines or tickets (to be returned via mail or fax);<br>3 = Users can pay fines or tickets online. | 0   |
| 64 | 4. Service                                                                                                                                                                                                                                         | Does the site allow users to apply (or register) for permits?                                                           | 0 = No;<br>1 = The site provides information about where to call about applying for permits;<br>2 = The site allows users to download forms for applying for permits (to be returned via mail or fax);                                                     | 0   |

|    |            |                                                                                                                                                                                                                                                                                                                                                                                    |   |
|----|------------|------------------------------------------------------------------------------------------------------------------------------------------------------------------------------------------------------------------------------------------------------------------------------------------------------------------------------------------------------------------------------------|---|
|    |            | 3 = Users can apply for permits online.                                                                                                                                                                                                                                                                                                                                            |   |
| 65 | 4. Service | Does the site provide an online tracking system for the status of permits?<br>0 = No,<br>1 = Very limited information is provided after approval (only permit number and approval date);<br>2 = Information in real time, including the status of the permit process;<br>3 = Information in real time, including both the current status and future process of the permit process. | 0 |
| 66 | 4. Service | Does the site allow users to apply for licenses?<br>0 = No;<br>1 = The site provides information for users to apply for licenses by fax or telephone;<br>2 = The site allows users to download license forms (.doc or .pdf) to be returned via mail or fax;<br>3 = Users can apply for licenses through online forms.                                                              | 0 |
| 67 | 4. Service | Number of permits or licenses that can be applied online in the city government<br>0 = No,<br>1 = One or two permits (licenses);<br>2 = Three or four permits (licenses);<br>3 = More than four permits (licenses).                                                                                                                                                                | 0 |
| 68 | 4. Service | Does the site allow for e-procurement?<br>0 = No;<br>1 = The site allows potential bidders to access RFPs (requests for proposals) and the statuses of procurements online in html format;<br>2 = The site allows potential bidders to download RFPs (.doc or .pdf);<br>3 = The site allows potential bidders to place bids online.                                                | 0 |
| 69 | 4. Service | Does the site allow users to look up<br>0 = No;<br>1 = The site allows users to                                                                                                                                                                                                                                                                                                    | 0 |

|    |                                                       |                                                                                                                                                                                                                              |                                                                                                                                                                                                                                                                                                                                                                |   |   |   |
|----|-------------------------------------------------------|------------------------------------------------------------------------------------------------------------------------------------------------------------------------------------------------------------------------------|----------------------------------------------------------------------------------------------------------------------------------------------------------------------------------------------------------------------------------------------------------------------------------------------------------------------------------------------------------------|---|---|---|
|    | property assessments that are used for levying taxes? | look up property assessments in an html format (e.g., as a web page);<br>2 = The site allows users to download a listing of property assessments;<br>3 = The site allows users to search a database of property assessments. |                                                                                                                                                                                                                                                                                                                                                                |   |   |   |
| 70 | 4. Service                                            | Does the site offer searchable databases?                                                                                                                                                                                    | 0 = No;<br>3 = The site offers searchable databases.                                                                                                                                                                                                                                                                                                           | X | X | 0 |
| 71 | 4. Service                                            | Does the site allow users to file complaints?                                                                                                                                                                                | 0 = No;<br>1 = The site has contact information for users to submit complaints;<br>2 = The site has an e-mail link (mail to:) or an online form that users can use to submit complaints;<br>3 = The site allows users to track their complaint as it is processed and/or action is taken.                                                                      |   |   | 0 |
| 72 | 4. Service                                            | Does the site provide a bulletin board for posting questions about civil applications and answers from public officials?                                                                                                     | 0 = No;<br>1 = The site provides one bulletin board for posting questions about civil applications and answers from public officials, without the categories of subjects in civil applications;<br>2 = The bulletin boards are divided into two or three subjects in civil applications;<br>3 = The bulletin boards are divided into more than three subjects. |   |   | 0 |
| 73 | 4. Service                                            | In the bulletin board of questions and answers for civil applications, does the site provide timely answers?                                                                                                                 | 0 = No site;<br>1 = Answers are posted after two months, on average, when questions were posted;<br>2 = Answers are posted within one month, on average;<br>3 = Answers are posted                                                                                                                                                                             |   |   | 0 |

|    |            |                                                                                                                                                                              |                                                                                                                                                                                                                                                                                                                        |     |   |
|----|------------|------------------------------------------------------------------------------------------------------------------------------------------------------------------------------|------------------------------------------------------------------------------------------------------------------------------------------------------------------------------------------------------------------------------------------------------------------------------------------------------------------------|-----|---|
|    |            | within two weeks, on average.                                                                                                                                                |                                                                                                                                                                                                                                                                                                                        |     |   |
| 74 | 4. Service | Does the site provide an FAQ (Frequently Asked Questions) corner to guide citizens in city administration?                                                                   | 0 = No;<br>1 = The site provides an FAQ (Frequently Asked Questions) corner without subcategories of topics;<br>2 = The site provides an FAQ corner with several subcategories of topics.                                                                                                                              | X   | 0 |
| 75 | 4. Service | Does the site allow users to request information?                                                                                                                            | 0 = No;<br>1 = The site provides telephone numbers to request information;<br>2 = The site provides e-mail links to request information;<br>3 = The site provides online forms to request information.                                                                                                                 |     | 0 |
| 76 | 4. Service | Does the site allow users to customize the main city homepage depending on their needs (e.g., portal customization)?                                                         | 0 = No;<br>3 = The site allows users to customize the main city homepage depending on their needs.                                                                                                                                                                                                                     | X X | 0 |
| 77 | 4. Service | Does the site allow users to access private information online? (e.g., educational records, medical records, point total of driving violation, lost pet dogs, lost property) | 0 = No;<br>3 = The site allows users to access private information online.                                                                                                                                                                                                                                             | X X | 0 |
| 78 | 4. Service | Does the site allow users to register or purchase tickets to events in city/municipal halls, arenas, or facilities of the city?                                              | 0 = No;<br>1 = The site contains information for registering or purchasing tickets to events;<br>2 = The site allows users to download a form for registering or purchasing tickets to events that can be returned via fax or mail;<br>3 = The site allows users to register or purchase tickets through online forms. |     | 0 |
| 79 | 4. Service | How long does it take for the webmaster to respond to the following question                                                                                                 | 0 = No response;<br>1 = It took greater than 1 week;<br>2 = It took 3–7 days;                                                                                                                                                                                                                                          |     | 0 |

|    |                                                                                              |                                                                                                                                                                                                                                                                                                                                                                                                                                                                           |   |
|----|----------------------------------------------------------------------------------------------|---------------------------------------------------------------------------------------------------------------------------------------------------------------------------------------------------------------------------------------------------------------------------------------------------------------------------------------------------------------------------------------------------------------------------------------------------------------------------|---|
|    | about the city's website by e-mail? (Question: How often do you update your city's website?) | 3 = It took less than three days (excluding the days the office is closed such as Sunday and holidays in the city).                                                                                                                                                                                                                                                                                                                                                       |   |
| 80 | 4. Service                                                                                   | <p>Does the site allow users to report crimes, violations of administrative laws and regulations, or corruption?</p> <p>0 = No;<br/>1 = The site contains contact information (mailing addresses, phone numbers, or e-mail addresses) for reporting crimes, violations, or corruption;<br/>2 = The site provides forms for reporting in a downloadable format (e.g., .doc or .pdf);<br/>3 = Users can report crimes, violations, or corruption through online forms.</p>  | 0 |
| 81 | 5. Citizen Participation                                                                     | <p>Does the website allow users to provide comments or feedback to individual departments/agencies through online forms?</p> <p>0 = No;<br/>1 = Departments/agencies post phone numbers or fax numbers for submitting comments or feedback;<br/>2 = Departments/agencies provide an e-mail address (and a mailing address as well) for submitting comments or feedback;<br/>3 = Several departments allow users to provide comments or feedback through online forms.</p> | 0 |
| 82 | 5. Citizen Participation                                                                     | <p>Does the website allow users to provide comments or feedback to elected officials (e.g., the mayor or city council)?</p> <p>0 = No;<br/>1 = The mayor or city council has an e-mail posted;<br/>2 = Both the mayor and city council have e-mails posted;<br/>3 = In addition to the e-mails posted, the mayor or city council allows users to provide comments or feedback to elected officials through an online form.</p>                                            | 0 |
| 83 | 5. Citizen Participation                                                                     | <p>Does the site offer a newsletter or community updates</p> <p>0 = No;<br/>1 = The site has a newsletter or community</p>                                                                                                                                                                                                                                                                                                                                                | 0 |

|    |                                   |                                                                                                                                                                                                                                                                                           |                                                                                                                                                                                                                                                                                                                           |     |   |
|----|-----------------------------------|-------------------------------------------------------------------------------------------------------------------------------------------------------------------------------------------------------------------------------------------------------------------------------------------|---------------------------------------------------------------------------------------------------------------------------------------------------------------------------------------------------------------------------------------------------------------------------------------------------------------------------|-----|---|
|    | linked to the main city homepage? | updates in html format;<br>2 = The site has a newsletter or community updates that can be downloaded (e.g., as a .doc or .PDF);<br>3 = The site has a newsletter or community updates that are distributed via e-mail.                                                                    |                                                                                                                                                                                                                                                                                                                           |     |   |
| 84 | 5. Citizen Participation          | Is there a subscription option available for the newsletter or listserv?                                                                                                                                                                                                                  | 0 = No;<br>1 = There is a subscription option available for the newsletter or listserv.                                                                                                                                                                                                                                   | X X | 0 |
| 85 | 5. Citizen Participation          | Is there an “unsubscribe” option available for the newsletter or listserv?                                                                                                                                                                                                                | 0 = No;<br>1 = There is an “unsubscribe” option available for the newsletter or listserv.                                                                                                                                                                                                                                 | X X | 0 |
| 86 | 5. Citizen Participation          | Does the site have an online bulletin board or chat capabilities for gathering citizens’ input on public issues? (“Online bulletin board” or “chat capabilities” means a city website corner where any citizen can posts ideas, comments, or opinions without specific discussion topics) | 0 = No;<br>1 = The site has an online bulletin board or chat capabilities for gathering citizens’ input on issues;<br>2 = The site has an online bulletin board or chat capabilities by which one can search authors and key words.                                                                                       | X   | 0 |
| 87 | 5. Citizen Participation          | Does the website offer an online discussion forum on policy issues? (“Online discussion forum” means a city website corner where the city arranges public consultation on policy issues and citizens participate in discussing those specific topics)                                     | 0 = No;<br>1 = The site has no online discussion forum, but the site posts a notice of gathering citizens’ opinions about policy issues through e-mail, fax, or telephone;<br>2 = The site has an online discussion forum;<br>3 = The site has an online discussion forum and posts past discussion subjects and results. |     | 0 |
| 88 | 5. Citizen Participation          | Participants on online forums (1 point for each factor, maximum = 3)                                                                                                                                                                                                                      | +1 point: Participation of public officials as discussants; +1 point: Participation of experts on                                                                                                                                                                                                                         |     | 0 |



|    |                                                                                                                                                                                                                                                                |                                                                                                                                                                                                                                                          |   |
|----|----------------------------------------------------------------------------------------------------------------------------------------------------------------------------------------------------------------------------------------------------------------|----------------------------------------------------------------------------------------------------------------------------------------------------------------------------------------------------------------------------------------------------------|---|
|    |                                                                                                                                                                                                                                                                | the issue (posting opinions about the issue or participating as discussants); +1 point: Existence of a forum moderator.                                                                                                                                  |   |
| 89 | 5. Citizen Participation<br>Formats of online forums (1 point for each factor, maximum = 3)                                                                                                                                                                    | +1 point: E-mail notice about new messages; +1 point: Provides summaries of discussions at regular intervals (daily, weekly, or monthly); +1 point: Provides opportunities for citizens to suggest discussion.                                           | 0 |
| 90 | 5. Citizen Participation<br>Does the site have scheduled e-meetings for discussion? ("e-meeting" means real-time discussion that takes place at the specific appointed time in a synchronized way such that participants can exchange opinions simultaneously) | 0 = No;<br>1 = The site has scheduled e-meetings for discussion between citizens;<br>2 = The site has scheduled e-meetings for discussion between citizens and public officials;<br>3 = In addition, the site posts past e-meeting subjects and results. | 0 |
| 91 | 5. Citizen Participation<br>Number of online discussion forums or e-meetings in the past year (including online discussion forums and scheduled e-meetings)                                                                                                    | 0 = No;<br>1 = One time in the past year;<br>2 = Two times in the past year;<br>3 = More than three times in the past year.                                                                                                                              | 0 |
| 92 | 5. Citizen Participation<br>Does the site offer online surveys/polls for specific issues?                                                                                                                                                                      | 0 = No;<br>1 = The site offers online surveys/polls for specific issues;<br>2 = In addition, the site posts the results of past online surveys/polls;<br>3 = The site shows the real time results of current online surveys/polls.                       | 0 |
| 93 | 5. Citizen Participation<br>Number of online surveys/polls in the past year (including online surveys and online polls, excluding those off-line)                                                                                                              | 0 = No;<br>1 = One time in the past year;<br>2 = Two times in the past year;<br>3 = More than three times in the past year.                                                                                                                              | 0 |

|    |                                                                                                                                                                                                                                                                                                                      |                                                                                                                                                                                                                                                                                                                        |   |
|----|----------------------------------------------------------------------------------------------------------------------------------------------------------------------------------------------------------------------------------------------------------------------------------------------------------------------|------------------------------------------------------------------------------------------------------------------------------------------------------------------------------------------------------------------------------------------------------------------------------------------------------------------------|---|
| 94 | 5. Citizen Participation Does the website offer synchronous videos of public events?                                                                                                                                                                                                                                 | <p>0 = No;<br/> 1 = The site offers asynchronous or archived (not live) videos of public events;<br/> 2 = The site offers live or synchronous videos of public events;<br/> 3 = The site offers live or synchronous videos of public events and has a mechanism for online users to provide comments or questions.</p> | 0 |
| 95 | 5. Citizen Participation Does the website grant users access to an online citizen satisfaction survey?                                                                                                                                                                                                               | <p>0 = No;<br/> 1 = The site offers contact information about participation in a citizen satisfaction survey;<br/> 2 = A citizen satisfaction survey can be downloaded and returned via fax or telephone;<br/> 3 = A citizen satisfaction survey can be completed through online forms.</p>                            | 0 |
| 96 | 5. Citizen Participation Are survey results published on the website?                                                                                                                                                                                                                                                | <p>0 = No;<br/> 1 = The site offers contact information for obtaining the results to a citizen satisfaction survey ;<br/> 2 = Citizen satisfaction survey results can be downloaded from the website;<br/> 3 = Citizen satisfaction survey results are in a searchable database online.</p>                            | 0 |
| 97 | 5. Citizen Participation Does the site offer tools for online decision making (e-petitions, electronic citizen juries, e-referenda)? (Note: “E-petitions” or “electronic petitions” are formal requests to a city council or a government agency, signed by a number of citizens online, to raise issues of concern) | <p>0 = No;<br/> 1 = One category;<br/> 2 = Two categories;<br/> 3 = Three categories. (Note: Electronic citizen juries consist of a group of representative citizens who take evidence about issues over an extended period, deliberate online, and recommend conclusions to the government. E-referenda or online</p> | 0 |

|     |                          |                                                                                                                                                                                                                                                              |                                                                                                                                                                                                                                                                                                                                     |     |   |
|-----|--------------------------|--------------------------------------------------------------------------------------------------------------------------------------------------------------------------------------------------------------------------------------------------------------|-------------------------------------------------------------------------------------------------------------------------------------------------------------------------------------------------------------------------------------------------------------------------------------------------------------------------------------|-----|---|
|     |                          | referenda refer to asking the whole population to vote online on issues, thereby introducing or amending policies.)                                                                                                                                          |                                                                                                                                                                                                                                                                                                                                     |     |   |
| 98  | 5. Citizen Participation | Are performance measures, standards, or benchmarks published on the website? ("Performance measures", "standards", or "benchmarks" mean output, efficiency, effectiveness, or outcome indicators or indexes set by the city to achieve administrative goals) | 0 = No;<br>1 = Performance measures, standards, or benchmarks are listed on the website in html (e.g., as a web page);<br>2 = Performance measures, standards, or benchmarks can be downloaded from the website (e.g., .doc or .pdf);<br>3 = Performance measures, standards, or benchmarks are available in a searchable database. |     | 0 |
| 99  | 5. Citizen Participation | Does the city have a citywide performance measurement system published on the website?                                                                                                                                                                       | 0 = No;<br>3 = The city has a citywide performance measurement system across all departments.                                                                                                                                                                                                                                       | X X | 0 |
| 100 | 5. Citizen Participation | Are the results of the performance measurement published on the website?                                                                                                                                                                                     | 0 = No;<br>1 = The site offers contact information for obtaining the results of the performance measurement ;<br>2 = The performance measurement results can be downloaded from the website;<br>3 = The performance measurement results are in a searchable database online.                                                        |     | 0 |
| 101 | COVID 19                 | Is there information about the COVID-19 pandemic?                                                                                                                                                                                                            | 0 = No<br>+1 point: Note about the infection rate in the locality; +1 point: Local regulations on COVID-19; +1 point: There is a link to the Prefecture/Public Health Direction with information about the pandemic.                                                                                                                |     | 0 |
| 102 | COVID 19                 | Is there any information on vaccination?                                                                                                                                                                                                                     | 0 = No                                                                                                                                                                                                                                                                                                                              |     | 0 |

|                                | +1 point: General information about existing vaccine types;<br>+1 point: There is a list of vaccination centers in or near the town;<br>+1 point: Appointments can be made at a vaccination center. |                  |                |
|--------------------------------|-----------------------------------------------------------------------------------------------------------------------------------------------------------------------------------------------------|------------------|----------------|
| Total                          | Full score: 227                                                                                                                                                                                     | Unweighted Score | Weighted Score |
| Privacy: Q1~20                 | Full score: 31                                                                                                                                                                                      | 0                | 0.00           |
| Usability: Q21~40              | Full score: 32                                                                                                                                                                                      | 0                | 0.00           |
| Content: Q41~60                | Full score: 50                                                                                                                                                                                      | 0                | 0.00           |
| Service: Q61~80                | Full score: 59                                                                                                                                                                                      | 0                | 0.00           |
| Citizen participation: Q81~100 | Full score: 55                                                                                                                                                                                      | 0                | 0.00           |
|                                | Total Score                                                                                                                                                                                         | 0                | 0.00           |

**Table S2.** List of the Romanian Cities and the Corresponding Website Addresses.

| Running Number | City               | Web Address                                                                                                                                                                                                         |
|----------------|--------------------|---------------------------------------------------------------------------------------------------------------------------------------------------------------------------------------------------------------------|
| 1              | Abrud              | <a href="http://www.primaria-abrud.ro/">http://www.primaria-abrud.ro/</a>                                                                                                                                           |
| 2              | Adjud              | <a href="http://www.adjud.ro/">http://www.adjud.ro/</a>                                                                                                                                                             |
| 3              | Agnita             | <a href="http://www.primaria-agnita.ro/">http://www.primaria-agnita.ro/</a>                                                                                                                                         |
| 4              | Aiud               | <a href="http://www.aiud.ro/">http://www.aiud.ro/</a>                                                                                                                                                               |
| 5              | Alba Iulia         | <a href="http://www.apulum.ro">http://www.apulum.ro</a>                                                                                                                                                             |
| 6              | Aleșd              | <a href="http://www.alesd-bihor.ro/">http://www.alesd-bihor.ro/</a>                                                                                                                                                 |
| 7              | Alexandria         | <a href="http://www.alexandria.ro/">http://www.alexandria.ro/</a>                                                                                                                                                   |
| 8              | Amara              | <a href="https://primaria-amara.ro/">https://primaria-amara.ro/</a>                                                                                                                                                 |
| 9              | Anina              | <a href="http://www.anina.ro/">http://www.anina.ro/</a>                                                                                                                                                             |
| 10             | Aninoasa           | <a href="http://www.jiuvalley.com/romana/orase/aninoasa/">http://www.jiuvalley.com/romana/orase/aninoasa/</a>                                                                                                       |
| 11             | Arad               | <a href="http://www.primariaarad.ro">http://www.primariaarad.ro</a>                                                                                                                                                 |
| 12             | Avrig              | <a href="http://www.primaria-avrig.ro/">http://www.primaria-avrig.ro/</a>                                                                                                                                           |
| 13             | Azuga              | <a href="http://www.primariaazuga.ro/">http://www.primariaazuga.ro/</a>                                                                                                                                             |
| 14             | Babadag            | <a href="http://www.primaria-babadag.ro">http://www.primaria-babadag.ro</a>                                                                                                                                         |
| 15             | Bacău              | <a href="http://www.primariabacau.ro/">http://www.primariabacau.ro/</a>                                                                                                                                             |
| 16             | Baia de Aramă      | <a href="http://www.baiadearama.ro/">http://www.baiadearama.ro/</a>                                                                                                                                                 |
| 17             | Baia Sprie         | <a href="http://www.baiasprie.com/">http://www.baiasprie.com/</a>                                                                                                                                                   |
| 18             | Băicoi             | <a href="http://www.primariabaicoi.ro/">http://www.primariabaicoi.ro/</a>                                                                                                                                           |
| 19             | Băile Olănești     | <a href="http://www.primariabaileolanesti.ro/">http://www.primariabaileolanesti.ro/</a>                                                                                                                             |
| 20             | Băile Tușnad       | <a href="http://www.tusnadfurdo.info/index.php?ChngLANG_select=ro">http://www.tusnadfurdo.info/index.php?ChngLANG_select=ro</a>                                                                                     |
| 21             | Băilești           | <a href="http://www.primariabailesti.ro/">http://www.primariabailesti.ro/</a>                                                                                                                                       |
| 22             | Bălan              | <a href="http://www.orasulbalan.ro/main.php?lang=ro">http://www.orasulbalan.ro/main.php?lang=ro</a>                                                                                                                 |
| 23             | Bălcești           | <a href="https://saad-mirror.net/domain-balcesti.senap.ro/doc_display.php?docALIAS=homepage&amp;sourceunit=">https://saad-mirror.net/domain-balcesti.senap.ro/doc_display.php?docALIAS=homepage&amp;sourceunit=</a> |
| 24             | Balș               | <a href="http://www.bals.ro/bals/servlet/portal">http://www.bals.ro/bals/servlet/portal</a>                                                                                                                         |
| 25             | Baraolt            | <a href="https://primariabaraolt.ro/index.php/ro/">https://primariabaraolt.ro/index.php/ro/</a>                                                                                                                     |
| 26             | Bârlad             | <a href="http://www.primariabarlاد.ro/">http://www.primariabarlاد.ro/</a>                                                                                                                                           |
| 27             | Bechet             | <a href="https://primariabechet.ro/">https://primariabechet.ro/</a>                                                                                                                                                 |
| 28             | Beclean            | <a href="http://www.primariabeclean.ro/">http://www.primariabeclean.ro/</a>                                                                                                                                         |
| 29             | Beiuș              | <a href="http://www.primariabeius.decnet.ro/">http://www.primariabeius.decnet.ro/</a>                                                                                                                               |
| 30             | Berești            | <a href="https://www.orasulberesti.ro/">https://www.orasulberesti.ro/</a>                                                                                                                                           |
| 31             | Bicaz              | <a href="http://www.primariabicaz.ro/">http://www.primariabicaz.ro/</a>                                                                                                                                             |
| 32             | Bistrița           | <a href="http://www.primariabistrita.ro">www.primariabistrita.ro</a>                                                                                                                                                |
| 33             | Blaj               | <a href="http://www.primariablaj.ro/">www.primariablaj.ro/</a>                                                                                                                                                      |
| 34             | Bolintin Vale      | <a href="http://www.bolintin.net/">http://www.bolintin.net/</a>                                                                                                                                                     |
| 35             | Borșa              | <a href="http://www.primaria.borsa.ro/page.php?2">http://www.primaria.borsa.ro/page.php?2</a>                                                                                                                       |
| 36             | Borsec             | <a href="http://www.primaria-borsec.ro/">http://www.primaria-borsec.ro/</a>                                                                                                                                         |
| 37             | Botoșani           | <a href="http://www.primariabt.ro">http://www.primariabt.ro</a>                                                                                                                                                     |
| 38             | Brad               | <a href="http://www.e-brad.ro/">http://www.e-brad.ro/</a>                                                                                                                                                           |
| 39             | Bragadiru          | <a href="https://www.primariaorasbragadiru.ro/">https://www.primariaorasbragadiru.ro/</a>                                                                                                                           |
| 40             | Brăila             | <a href="http://pmb.braila.astral.ro">http://pmb.braila.astral.ro</a>                                                                                                                                               |
| 41             | Brașov             | <a href="http://www.brasovcity.ro">http://www.brasovcity.ro</a>                                                                                                                                                     |
| 42             | Breaza             | <a href="http://www.primariabreaza.ro/">http://www.primariabreaza.ro/</a>                                                                                                                                           |
| 43             | Broșteni           | <a href="https://primariaorasbrosteni.blogspot.com/">https://primariaorasbrosteni.blogspot.com/</a>                                                                                                                 |
| 44             | București          | <a href="https://www.pmb.ro/">https://www.pmb.ro/</a>                                                                                                                                                               |
| 45             | București Sector 1 | <a href="http://www.primariasector1.ro">http://www.primariasector1.ro</a>                                                                                                                                           |
| 46             | București Sector 2 | <a href="http://www.ps2.ro">http://www.ps2.ro</a>                                                                                                                                                                   |

|    |                       |                                                                                                                             |
|----|-----------------------|-----------------------------------------------------------------------------------------------------------------------------|
| 47 | București Sector 3    | <a href="http://www.sector3primarie.ro">http://www.sector3primarie.ro</a>                                                   |
| 48 | București Sector 4    | <a href="http://www.ps4.ro">http://www.ps4.ro</a>                                                                           |
| 49 | București Sector 5    | <a href="http://www.bucuresti5.ro">http://www.bucuresti5.ro</a>                                                             |
| 50 | București Sector 6    | <a href="http://www.primarie6.ro">http://www.primarie6.ro</a>                                                               |
| 51 | Buftea                | <a href="https://primariebuftea.weebly.com/">https://primariebuftea.weebly.com/</a>                                         |
| 52 | Buhuși                | <a href="https://www.primariabuhusi.ro/">https://www.primariabuhusi.ro/</a>                                                 |
| 53 | Bumbești-Jiu          | <a href="https://www.bumbesti-jiu.ro/">https://www.bumbesti-jiu.ro/</a>                                                     |
| 54 | Bușteni               | <a href="https://orasul-busteni.ro/">https://orasul-busteni.ro/</a>                                                         |
| 55 | Buzău                 | <a href="https://primariabuzau.ro/">https://primariabuzau.ro/</a>                                                           |
| 56 | Buziaș                | <a href="http://www.primbuzias.rdstm.ro/">http://www.primbuzias.rdstm.ro/</a>                                               |
| 57 | Călan                 | <a href="http://www.primariacalan.ro/">http://www.primariacalan.ro/</a>                                                     |
| 58 | Călărași              | <a href="http://www.municipiu.ro/">www.municipiu.ro/</a>                                                                    |
| 59 | Calimanesti           | <a href="http://www.primariacalimanesti.ro/">http://www.primariacalimanesti.ro/</a>                                         |
| 60 | Câmpia Turzii         | <a href="http://www.campiaturzii.ro/">http://www.campiaturzii.ro/</a>                                                       |
| 61 | Câmpina               | <a href="http://www.primariacampina.ro/">http://www.primariacampina.ro/</a>                                                 |
| 62 | Câmpulung Moldovenesc | <a href="http://www.campulungmoldovenesc.ro/">http://www.campulungmoldovenesc.ro/</a>                                       |
| 63 | Câmpulung-Muscel      | <a href="http://www.primariacampulung.ro/">http://www.primariacampulung.ro/</a>                                             |
| 64 | Caracal               | <a href="http://www.primariacaracal.ro/work/">http://www.primariacaracal.ro/work/</a>                                       |
| 65 | Caransebeș            | <a href="http://www.primaria-caransebes.ro/">http://www.primaria-caransebes.ro/</a>                                         |
| 66 | Carei                 | <a href="http://www.primariacarei.ro/">http://www.primariacarei.ro/</a>                                                     |
| 67 | Cavnic                | <a href="http://www.cavnic.ro/">http://www.cavnic.ro/</a>                                                                   |
| 68 | Căzănești             | <a href="https://primariacazanestiil.ro/">https://primariacazanestiil.ro/</a>                                               |
| 69 | Cehu Silvaniei        | <a href="http://www.primariacehusilvaniei.ro/">http://www.primariacehusilvaniei.ro/</a>                                     |
| 70 | Cernavodă             | <a href="http://www.primaria-cernavoda.ro/">http://www.primaria-cernavoda.ro/</a>                                           |
| 71 | Chișineu Criș         | <a href="http://www.chisineucris.ro/">http://www.chisineucris.ro/</a>                                                       |
| 72 | Chitila               | <a href="https://www.primariachitila.ro/echitila/index.php">https://www.primariachitila.ro/echitila/index.php</a>           |
| 73 | Ciacova               | <a href="http://www.primariaciacova.ro/">http://www.primariaciacova.ro/</a>                                                 |
| 74 | Cisnădie              | <a href="http://www.cisnadie.ro/">http://www.cisnadie.ro/</a>                                                               |
| 75 | Cluj-Napoca           | <a href="http://www.primariaclujnapoca.ro">http://www.primariaclujnapoca.ro</a>                                             |
| 76 | Codlea                | <a href="http://www.primariacodlea.ro/">http://www.primariacodlea.ro/</a>                                                   |
| 77 | Comănești             | <a href="http://www.comanesti.ro/">www.comanesti.ro/</a>                                                                    |
| 78 | Comarnic              | <a href="http://www.primariacomarnic.ro/">www.primariacomarnic.ro/</a>                                                      |
| 79 | Constanța             | <a href="http://www.primaria-constanta.ro">http://www.primaria-constanta.ro</a>                                             |
| 80 | Copșa Mică            | <a href="http://www.copsa-mica.ro/">http://www.copsa-mica.ro/</a>                                                           |
| 81 | Corabia               | <a href="http://www.primariacorabia.ro/">http://www.primariacorabia.ro/</a>                                                 |
| 82 | Costești              | <a href="http://www.primariacostestiag.ro/">http://www.primariacostestiag.ro/</a>                                           |
| 83 | Covasna               | <a href="http://www.kovaszna.ro/roman/belso.php?cid=27">http://www.kovaszna.ro/roman/belso.php?cid=27</a>                   |
| 84 | Craiova               | <a href="http://www.primariacraiova.ro">http://www.primariacraiova.ro</a>                                                   |
| 85 | Cristuru Secuiesc     | <a href="http://www.keresztur.ro/">http://www.keresztur.ro/</a>                                                             |
| 86 | Cugir                 | <a href="http://www.primariacugir.ro/">http://www.primariacugir.ro/</a>                                                     |
| 87 | Curtea de Arges       | <a href="http://www.primariacurteadearges.ro">http://www.primariacurteadearges.ro</a>                                       |
| 88 | Curtici               | <a href="http://www.primariacurtici.ro/">www.primariacurtici.ro/</a>                                                        |
| 89 | Dăbuleni              | <a href="http://www.primariadabuleni.ro/">http://www.primariadabuleni.ro/</a>                                               |
| 90 | Darabani              | <a href="http://www.primariadarabani.ro/">http://www.primariadarabani.ro/</a>                                               |
| 91 | Darmanești            | <a href="http://www.primariadarmanesti.ro/">http://www.primariadarmanesti.ro/</a>                                           |
| 92 | Dej                   | <a href="http://main.dej.ro/default.aspx">http://main.dej.ro/default.aspx</a>                                               |
| 93 | Deta                  | <a href="http://www.detatm.ro/">http://www.detatm.ro/</a>                                                                   |
| 94 | Deva                  | <a href="http://www.primariadeva.ro/">http://www.primariadeva.ro/</a>                                                       |
| 95 | Dolhasca              | <a href="https://primariadolhasca.ro/">https://primariadolhasca.ro/</a>                                                     |
| 96 | Dorohoi               | <a href="http://www.primaria.dorohoi.com/">http://www.primaria.dorohoi.com/</a>                                             |
| 97 | Drăgănești-Olt        | <a href="http://www.draganesti-olt.ro/draganesti/servlet/portal">http://www.draganesti-olt.ro/draganesti/servlet/portal</a> |

|     |                       |                                                                                                                                 |
|-----|-----------------------|---------------------------------------------------------------------------------------------------------------------------------|
| 98  | Dragomirești          | <a href="https://dragomiresti-maramures.ro/">https://dragomiresti-maramures.ro/</a>                                             |
| 99  | Drobeta Turnu Severin | <a href="http://www.primaria-dts.ro">http://www.primaria-dts.ro</a>                                                             |
| 100 | Dumbrăveni            | <a href="https://www.primariadumbraveni.ro/">https://www.primariadumbraveni.ro/</a>                                             |
| 101 | Eforie                | <a href="http://www.primariaeforie.ro/">http://www.primariaeforie.ro/</a>                                                       |
| 102 | Făgăraș               | <a href="http://www.primaria-fagaras.ro/ro/">http://www.primaria-fagaras.ro/ro/</a>                                             |
| 103 | Făget                 | <a href="https://primariafaget.ro/">https://primariafaget.ro/</a>                                                               |
| 104 | Fălticeni             | <a href="http://www.falticeni.ro/main.php">http://www.falticeni.ro/main.php</a>                                                 |
| 105 | Fetești               | <a href="http://www.munfetesti.ro/">http://www.munfetesti.ro/</a>                                                               |
| 106 | Fieni                 | <a href="http://www.fieni.ro/">http://www.fieni.ro/</a>                                                                         |
| 107 | Fierbinți Târg        | <a href="http://primariafierbinti.ro/">http://primariafierbinti.ro/</a>                                                         |
| 108 | Filiași               | <a href="http://www.primaria-filiasi.ro/">http://www.primaria-filiasi.ro/</a>                                                   |
| 109 | Flămânzi              | <a href="http://orasul-flamanzi.ro/">http://orasul-flamanzi.ro/</a>                                                             |
| 110 | Focșani               | <a href="http://www.focsani.info">http://www.focsani.info</a>                                                                   |
| 111 | Frasin                | <a href="https://www.primariaorasuluifracin.ro/">https://www.primariaorasuluifracin.ro/</a>                                     |
| 112 | Găești                | <a href="http://www.primaria-gaesti.ro/">http://www.primaria-gaesti.ro/</a>                                                     |
| 113 | Galați                | <a href="http://www.primaria.galati.ro">http://www.primaria.galati.ro</a>                                                       |
| 114 | Gătaia                | <a href="http://www.primariaorasgataia.ro/">http://www.primariaorasgataia.ro/</a>                                               |
| 115 | Geoagiu               | <a href="http://www.geoagiu.ro/">http://www.geoagiu.ro/</a>                                                                     |
| 116 | Gheorghieni           | <a href="http://www.primariagheorgheni.ro/?pg=ifiteka">http://www.primariagheorgheni.ro/?pg=ifiteka</a>                         |
| 117 | Gherla                | <a href="http://www.primaria-gherla.ro/">http://www.primaria-gherla.ro/</a>                                                     |
| 118 | Ghimbav               | <a href="http://www.gpanel.ro/primaria-ghimbav.ro/">http://www.gpanel.ro/primaria-ghimbav.ro/</a>                               |
| 119 | Giurgiu               | <a href="http://www.primaria-giurgiu.ro">http://www.primaria-giurgiu.ro</a>                                                     |
| 120 | Gura Humorului        | <a href="http://www.primariagh.ro/">http://www.primariagh.ro/</a>                                                               |
| 121 | Hârlău                | <a href="http://www.primaria-hirlau.ro/">http://www.primaria-hirlau.ro/</a>                                                     |
| 122 | Hârșova               | <a href="http://www.primaria-harsova.ro/">http://www.primaria-harsova.ro/</a>                                                   |
| 123 | Horezu                | <a href="http://www.primaria.horezuonline.ro/">http://www.primaria.horezuonline.ro/</a>                                         |
| 124 | Hunedoara             | <a href="http://www.primariahd.ro/">http://www.primariahd.ro/</a>                                                               |
| 125 | Huși                  | <a href="http://www.primariahusi.ro">www.primariahusi.ro</a>                                                                    |
| 126 | Ianca                 | <a href="http://www.primaria-ianca.ro/">http://www.primaria-ianca.ro/</a>                                                       |
| 127 | Iași                  | <a href="http://www.primaria-iasi.ro/">http://www.primaria-iasi.ro/</a>                                                         |
| 128 | Iernut                | <a href="http://www.e-primarii.ro/~iernut/">http://www.e-primarii.ro/~iernut/</a>                                               |
| 129 | Ineu                  | <a href="http://www.ineu.ro/">www.ineu.ro/</a>                                                                                  |
| 130 | Însurăței             | <a href="http://www.portal-braila.ro/Primarii/Insuratei/index.php">http://www.portal-braila.ro/Primarii/Insuratei/index.php</a> |
| 131 | Intorsura Buzăului    | <a href="http://intorsura-buzaului.com/">http://intorsura-buzaului.com/</a>                                                     |
| 132 | Isaccea               | <a href="http://isaccea.romclub.ro/">http://isaccea.romclub.ro/</a>                                                             |
| 133 | Jibou                 | <a href="http://www.primariajibou.ro/">http://www.primariajibou.ro/</a>                                                         |
| 134 | Jimbolia              | <a href="http://www.jimbolia.ro/">http://www.jimbolia.ro/</a>                                                                   |
| 135 | Lehliu Gara           | <a href="http://primarialehliugara.ro/">http://primarialehliugara.ro/</a>                                                       |
| 136 | Liteni                | <a href="https://primaria-liteni.ro/">https://primaria-liteni.ro/</a>                                                           |
| 137 | Livada                | <a href="https://www.primaria-livada.ro/ro">https://www.primaria-livada.ro/ro</a>                                               |
| 138 | Luduș                 | <a href="http://www.ludus.ro/">http://www.ludus.ro/</a>                                                                         |
| 139 | Lugoj                 | <a href="http://www.primarialugoj.ro/">http://www.primarialugoj.ro/</a>                                                         |
| 140 | Lupeni                | <a href="http://www.jiuvalley.com/romana/orase/lupeni/">http://www.jiuvalley.com/romana/orase/lupeni/</a>                       |
| 141 | Măcin                 | <a href="http://macin.romclub.ro/">http://macin.romclub.ro/</a>                                                                 |
| 142 | Măgurele              | <a href="https://primariamagurele.ro/">https://primariamagurele.ro/</a>                                                         |
| 143 | Mangalia              | <a href="http://www.mangalia.ro/">http://www.mangalia.ro/</a>                                                                   |
| 144 | Mărășești             | <a href="http://www.primariamarasesti.ro/">http://www.primariamarasesti.ro/</a>                                                 |
| 145 | Marghita              | <a href="http://www.marghita.ro/pages/primaria.php">http://www.marghita.ro/pages/primaria.php</a>                               |
| 146 | Medgidia              | <a href="http://www.emedgidia.ro/">www.emedgidia.ro/</a>                                                                        |
| 147 | Mediaș                | <a href="http://www.primariamedias.ro/">http://www.primariamedias.ro/</a>                                                       |
| 148 | Miercurea Ciuc        | <a href="http://clmc.topnet.ro/ro/">http://clmc.topnet.ro/ro/</a>                                                               |

|     |                   |                                                                                                                               |
|-----|-------------------|-------------------------------------------------------------------------------------------------------------------------------|
| 149 | Mihăilești        | <a href="http://primariieuropene.net/">http://primariieuropene.net/</a>                                                       |
| 150 | Milișăuți         | <a href="https://primariamilisauti.ro/">https://primariamilisauti.ro/</a>                                                     |
| 151 | Mioveni           | <a href="http://www.primariamioveni.ro/">http://www.primariamioveni.ro/</a>                                                   |
| 152 | Mizil             | <a href="http://www.igo.ro/primariamizil/">http://www.igo.ro/primariamizil/</a>                                               |
| 153 | Moinești          | <a href="http://www.moinesti.ro/">www.moinesti.ro/</a>                                                                        |
| 154 | Moldova Noua      | <a href="http://www.moldova-noua.ro/">http://www.moldova-noua.ro/</a>                                                         |
| 155 | Moreni            | <a href="http://www.primariamoreni.com/">www.primariamoreni.com/</a>                                                          |
| 156 | Motru             | <a href="http://www.primariamotru.ro/">http://www.primariamotru.ro/</a>                                                       |
| 157 | Murgeni           | <a href="https://primaria-murgeni.ro/">https://primaria-murgeni.ro/</a>                                                       |
| 158 | Nădlac            | <a href="http://www.primaria-nadlac.ro/">http://www.primaria-nadlac.ro/</a>                                                   |
| 159 | Năsăud            | <a href="http://www.primarianasaud.ro/">http://www.primarianasaud.ro/</a>                                                     |
| 160 | Năvodari          | <a href="http://www.primaria-navodari.ro/">www.primaria-navodari.ro/</a>                                                      |
| 161 | Negrești-Oaș      | <a href="http://www.negresti-oas.ro/">http://www.negresti-oas.ro/</a>                                                         |
| 162 | Negru Voda        | <a href="http://www.primarianegruvoda.ro/">http://www.primarianegruvoda.ro/</a>                                               |
| 163 | Nehoiu            | <a href="https://www.primaria-nehoiu.ro/">https://www.primaria-nehoiu.ro/</a>                                                 |
| 164 | Ocna Mures        | <a href="http://www.primariaocnamures.ro/">http://www.primariaocnamures.ro/</a>                                               |
| 165 | Ocnele Mari       | <a href="https://ocne.ro/">https://ocne.ro/</a>                                                                               |
| 166 | Odorheiu Secuiesc | <a href="http://www.udvph.ro/">www.udvph.ro/</a>                                                                              |
| 167 | Oltenița          | <a href="http://www.primariaoltenita.ro/">http://www.primariaoltenita.ro/</a>                                                 |
| 168 | Onești            | <a href="http://www.onesti.ro/">www.onesti.ro/</a>                                                                            |
| 169 | Oradea            | <a href="http://www.oradea.ro/">http://www.oradea.ro</a>                                                                      |
| 170 | Orăștie           | <a href="http://orastie.info.ro/">http://orastie.info.ro/</a>                                                                 |
| 171 | Oravița           | <a href="http://www.oravita.ro/">www.oravita.ro</a>                                                                           |
| 172 | Orșova            | <a href="http://primariaorsova.lx.ro/">http://primariaorsova.lx.ro/</a>                                                       |
| 173 | Otelul Roșu       | <a href="http://www.otelu-rosu.ro/">http://www.otelu-rosu.ro/</a>                                                             |
| 174 | Otopeni           | <a href="http://www.otopeniro.ro/">http://www.otopeniro.ro/</a>                                                               |
| 175 | Ovidiu            | <a href="http://www.primariaovidiu.ro/">http://www.primariaovidiu.ro/</a>                                                     |
| 176 | Pancota           | <a href="http://www.artelecom.net/primariapancota/">http://www.artelecom.net/primariapancota/</a>                             |
| 177 | Pantelimon        | <a href="https://www.primariapantelimon.ro/">https://www.primariapantelimon.ro/</a>                                           |
| 178 | Pașcani           | <a href="http://primaria.pascani.ro/">http://primaria.pascani.ro/</a>                                                         |
| 179 | Pătărlagele       | <a href="http://www.primariapatarlagele.ro/">http://www.primariapatarlagele.ro/</a>                                           |
| 180 | Pecica            | <a href="http://www.pecica.ro/">http://www.pecica.ro/</a>                                                                     |
| 181 | Petrila           | <a href="http://www.jiuvalley.com/romana/orase/petrila/index.asp">http://www.jiuvalley.com/romana/orase/petrila/index.asp</a> |
| 182 | Petroșani         | <a href="http://www.jiuvalley.com/romana/orase/petrosani/">http://www.jiuvalley.com/romana/orase/petrosani/</a>               |
| 183 | Piatra Neamț      | <a href="http://www.primariapn.ro">http://www.primariapn.ro</a>                                                               |
| 184 | Piatra Olt        | <a href="http://www.primariapiatraolt.ro/(?)">http://www.primariapiatraolt.ro/(?)</a>                                         |
| 185 | Pitești           | <a href="http://www.primariapitesti.ro">http://www.primariapitesti.ro</a>                                                     |
| 186 | Ploiești          | <a href="http://www.ploiesti.ro">http://www.ploiesti.ro</a>                                                                   |
| 187 | Plopeni           | <a href="http://www.primariaplopeni.ro/">http://www.primariaplopeni.ro/</a>                                                   |
| 188 | Podu Iloaiei      | <a href="https://primariapoduiloaiei.blogspot.com/">https://primariapoduiloaiei.blogspot.com/</a>                             |
| 189 | Pogoanele         | <a href="http://www.primariepogoanele.ro/index.php?x=primaria">http://www.primariepogoanele.ro/index.php?x=primaria</a>       |
| 190 | Potcoava          | <a href="http://primariapotcoava.judetulolt.ro/">http://primariapotcoava.judetulolt.ro/</a>                                   |
| 191 | Predeal           | <a href="http://www.primariapredeal.org/">http://www.primariapredeal.org/</a>                                                 |
| 192 | Pucioasa          | <a href="http://www.pucioasa.home.ro/">http://www.pucioasa.home.ro/</a>                                                       |
| 193 | Răcari            | <a href="https://primariaracari.ro/">https://primariaracari.ro/</a>                                                           |
| 194 | Rădăuți           | <a href="http://www.primariaradauti.ro/">http://www.primariaradauti.ro/</a>                                                   |
| 195 | Râmnicu Sărat     | <a href="http://www.primariersarat.ro/">http://www.primariersarat.ro/</a>                                                     |
| 196 | Râmnicu Vâlcea    | <a href="http://www.primariavl.ro">http://www.primariavl.ro</a>                                                               |
| 197 | Râșnov            | <a href="http://www.primariarasnov.ro/content/html/home.php">http://www.primariarasnov.ro/content/html/home.php</a>           |
| 198 | Recaș             | <a href="https://primariarecas.ro/">https://primariarecas.ro/</a>                                                             |
| 199 | Reghin            | <a href="http://www.primariareghin.ro/">http://www.primariareghin.ro/</a>                                                     |



|     |                   |                                                                                                             |
|-----|-------------------|-------------------------------------------------------------------------------------------------------------|
| 200 | Reșița            | <a href="http://www.primaria-resita.ro">http://www.primaria-resita.ro</a>                                   |
| 201 | Roman             | <a href="http://www.primariaroman.ro/">www.primariaroman.ro/</a>                                            |
| 202 | Roșiorii de Vede  | <a href="http://www.primariarosioriidevede.ro/">http://www.primariarosioriidevede.ro/</a>                   |
| 203 | Rovinari          | <a href="http://www.primariarovinari.ro/">http://www.primariarovinari.ro/</a>                               |
| 204 | Roznov            | <a href="https://www.primariaroznov.ro/">https://www.primariaroznov.ro/</a>                                 |
| 205 | Rupea             | <a href="http://primariarupea.ro/">http://primariarupea.ro/</a>                                             |
| 206 | Săcele            | <a href="http://www.municipiulsacele.ro/">http://www.municipiulsacele.ro/</a>                               |
| 207 | Săcuieni          | <a href="https://www.sacueni.ro/">https://www.sacueni.ro/</a>                                               |
| 208 | Salcea            | <a href="https://primariasalcea.ro/">https://primariasalcea.ro/</a>                                         |
| 209 | Săliște           | <a href="https://saliste-sibiu.ro/">https://saliste-sibiu.ro/</a>                                           |
| 210 | Săliștea de sus   | <a href="https://salisteadesus.ro/ro">https://salisteadesus.ro/ro</a>                                       |
| 211 | Salonta           | <a href="http://www.salonta.net">http://www.salonta.net</a>                                                 |
| 212 | Sănnicolau Mare   | <a href="http://www.sannicolau-mare.ro/">http://www.sannicolau-mare.ro/</a>                                 |
| 213 | Sântana           | <a href="http://www.primariasantana.ro/">http://www.primariasantana.ro/</a>                                 |
| 214 | Sărmașu           | <a href="https://orasulsarmasu.ro/ro">https://orasulsarmasu.ro/ro</a>                                       |
| 215 | Satu Mare         | <a href="http://www.satu-mare.net">http://www.satu-mare.net</a>                                             |
| 216 | Săveni            | <a href="http://www.primariasaveni.ro/">http://www.primariasaveni.ro/</a>                                   |
| 217 | Scornicești       | <a href="http://www.primariascornicesti.ro/">http://www.primariascornicesti.ro/</a>                         |
| 218 | Sebeș             | <a href="http://www.primariasebes.ro">www.primariasebes.ro</a>                                              |
| 219 | Sebiș             | <a href="http://www.primariasebis.ro">www.primariasebis.ro</a>                                              |
| 220 | Segarcea          | <a href="http://www.primariasegarcea.ro/">www.primariasegarcea.ro/</a>                                      |
| 221 | Seini             | <a href="http://www.seini.mmnet.ro/">http://www.seini.mmnet.ro/</a>                                         |
| 222 | Sfântu Gheorghe   | <a href="http://www.sfantugheorghe.ro/primaria">http://www.sfantugheorghe.ro/primaria</a>                   |
| 223 | Sibiu             | <a href="http://www.sibiu.ro">http://www.sibiu.ro</a>                                                       |
| 224 | Sighetu Marmației | <a href="http://www.primaria-sighet.ro/">http://www.primaria-sighet.ro/</a>                                 |
| 225 | Sighișoara        | <a href="http://www.sighisoara.org.ro/">http://www.sighisoara.org.ro/</a>                                   |
| 226 | Simeria           | <a href="http://www.primariasimeria.ro">http://www.primariasimeria.ro</a>                                   |
| 227 | Șimleu Silvaniei  | <a href="http://www.simleusilvaniei.ro/">http://www.simleusilvaniei.ro/</a>                                 |
| 228 | Sinaia            | <a href="http://www.primariasinaia.ro">http://www.primariasinaia.ro</a>                                     |
| 229 | Slănic            | <a href="http://www.primariaslanic.ro/">http://www.primariaslanic.ro/</a>                                   |
| 230 | Slănic Moldova    | <a href="http://www.primariaslanicmoldova.ro/portal/">http://www.primariaslanicmoldova.ro/portal/</a>       |
| 231 | Slatina           | <a href="http://www.primariaslatina.ro">http://www.primariaslatina.ro</a>                                   |
| 232 | Slobozia          | <a href="http://www.sloboziai.ro">http://www.sloboziai.ro</a>                                               |
| 233 | Solca             | <a href="http://solca.ro/index.php/primaria/">http://solca.ro/index.php/primaria/</a>                       |
| 234 | Șomcuta Mare      | <a href="https://www.somcutamare.ro/">https://www.somcutamare.ro/</a>                                       |
| 235 | Sovata            | <a href="http://primaria.szovata.ro/">http://primaria.szovata.ro/</a>                                       |
| 236 | Ștefănești        | <a href="https://orasulstefanesti-bt.ro/">https://orasulstefanesti-bt.ro/</a>                               |
| 237 | Ștei              | <a href="http://www.primariastei.decnet.ro/">http://www.primariastei.decnet.ro/</a>                         |
| 238 | Strehaia          | <a href="https://www.primariastrehaia.ro/">https://www.primariastrehaia.ro/</a>                             |
| 239 | Suceava           | <a href="http://www.primariasv.ro">http://www.primariasv.ro</a>                                             |
| 240 | Sulina            | <a href="http://sulina.romclub.ro/">http://sulina.romclub.ro/</a>                                           |
| 241 | Tâlmăciu          | <a href="http://primaria-talmaciu.ro/">http://primaria-talmaciu.ro/</a>                                     |
| 242 | Țândărei          | <a href="http://www.tandarei-ialomita.go.ro/">http://www.tandarei-ialomita.go.ro/</a>                       |
| 243 | Târgoviște        | <a href="http://www.pmtgv.ro">http://www.pmtgv.ro</a>                                                       |
| 244 | Târgu Cărbunești  | <a href="http://www.primariacarbunesti.ro/">http://www.primariacarbunesti.ro/</a>                           |
| 245 | Târgu Jiu         | <a href="http://www.targujiu.ro">http://www.targujiu.ro</a>                                                 |
| 246 | Târgu Lăpuș       | <a href="http://primaria.lapus.ro/">http://primaria.lapus.ro/</a>                                           |
| 247 | Târgu Mureș       | <a href="http://primaria.tirgumures.ro">http://primaria.tirgumures.ro</a>                                   |
| 248 | Târgu Neamț       | <a href="http://www.primariatgneamt.ro/">http://www.primariatgneamt.ro/</a>                                 |
| 249 | Târgu Ocna        | <a href="http://www.tirguocna.ro/portal/index.php">http://www.tirguocna.ro/portal/index.php</a>             |
| 250 | Târgu Secuiesc    | <a href="http://www.kezdi.ro/index.php?newlang=romanian">http://www.kezdi.ro/index.php?newlang=romanian</a> |

---

|     |                  |                                                                                                             |
|-----|------------------|-------------------------------------------------------------------------------------------------------------|
| 251 | Târnăveni        | <a href="http://www.primariatarnaveni.ro/">http://www.primariatarnaveni.ro/</a>                             |
| 252 | Tăuții-Măgheruş  | <a href="https://tautiimagheraus.ro/">https://tautiimagheraus.ro/</a>                                       |
| 253 | Tecuci           | <a href="http://www.primariatecuci.ro/">http://www.primariatecuci.ro/</a>                                   |
| 254 | Țicleni          | <a href="http://ticleni.ro/">http://ticleni.ro/</a>                                                         |
| 255 | Timișoara        | <a href="http://www.primariatm.ro">http://www.primariatm.ro</a>                                             |
| 256 | Tismana          | <a href="http://www.primariatismana.ro/">http://www.primariatismana.ro/</a>                                 |
| 257 | Toplița          | <a href="http://www.primaria-toplita.ro/">http://www.primaria-toplita.ro/</a>                               |
| 258 | Topoloveni       | <a href="http://www.topoloveni.ro/">http://www.topoloveni.ro/</a>                                           |
| 259 | Tulcea           | <a href="http://www.primaria-tulcea.ro">http://www.primaria-tulcea.ro</a>                                   |
| 260 | Turceni          | <a href="https://turceni.ro/">https://turceni.ro/</a>                                                       |
| 261 | Turda            | <a href="http://www.primturda.ro/">http://www.primturda.ro/</a>                                             |
| 262 | Turnu Măgurele   | <a href="http://www.municipiulturnumagurele.ro/">http://www.municipiulturnumagurele.ro/</a>                 |
| 263 | Ulmeni           | <a href="http://primariaulmenimm.ro/">http://primariaulmenimm.ro/</a>                                       |
| 264 | Ungheni          | <a href="https://www.primariaungheni.ro/">https://www.primariaungheni.ro/</a>                               |
| 265 | Uricani          | <a href="http://www.jiuvalley.com/romana/orase/uricani/">http://www.jiuvalley.com/romana/orase/uricani/</a> |
| 266 | Urlați           | <a href="http://www.urlati.ro/">http://www.urlati.ro/</a>                                                   |
| 267 | Urziceni         | <a href="http://www.urziceni.ro/">http://www.urziceni.ro/</a>                                               |
| 268 | Valea lui Mihai  | <a href="http://www.ermihalyfalva.ro/">http://www.ermihalyfalva.ro/</a>                                     |
| 269 | Vălenii de Munte | <a href="https://www.valeniidemunte.com.ro/">https://www.valeniidemunte.com.ro/</a>                         |
| 270 | Vânju Mare       | <a href="http://primariavinjumare.ro/">http://primariavinjumare.ro/</a>                                     |
| 271 | Vaşcău           | <a href="http://www.primariavascau.decn.ro/">www.primariavascau.decn.ro/</a>                                |
| 272 | Vaslui           | <a href="http://www.primariavaslui.ro">http://www.primariavaslui.ro</a>                                     |
| 273 | Vatra Dornei     | <a href="http://www.vatra-dornei.ro/">http://www.vatra-dornei.ro/</a>                                       |
| 274 | Vicovu de Sus    | <a href="https://primaria-vicovudesus.ro/">https://primaria-vicovudesus.ro/</a>                             |
| 275 | Victoria         | <a href="http://www.primariavictoria.ro/">http://www.primariavictoria.ro/</a>                               |
| 276 | Videle           | <a href="http://www.primariavidele.ro/">http://www.primariavidele.ro/</a>                                   |
| 277 | Vișeu de Sus     | <a href="http://www.primariaviseudesus.ro/">http://www.primariaviseudesus.ro/</a>                           |
| 278 | Vlăhița          | <a href="http://www.primariavlahita.ro/ro/index.php">http://www.primariavlahita.ro/ro/index.php</a>         |
| 279 | Voluntari        | <a href="https://orasulvoluntari.weebly.com/">https://orasulvoluntari.weebly.com/</a>                       |
| 280 | Vulcan           | <a href="http://www.e-vulcan.ro/">http://www.e-vulcan.ro/</a>                                               |
| 281 | Zalău            | <a href="http://www.zalausj.ro">http://www.zalausj.ro</a>                                                   |
| 282 | Zărnesti         | <a href="http://zarnesti.net/primaria_zarnesti.php">http://zarnesti.net/primaria_zarnesti.php</a>           |
| 283 | Zimnicea         | <a href="http://www.primariazimnicea.ro/">http://www.primariazimnicea.ro/</a>                               |
| 284 | Zlatna           | <a href="http://www.primaria-zlatna.ro/">www.primaria-zlatna.ro/</a>                                        |

---
